# Supplementary material
Source: PubMed Central journal article supplement (PMC2958244)
Supplement: NIHMS238687-supplement-1_si_001.pdf [file NIHMS238687-supplement-1_si_001.pdf]

# Freestanding and Reactive Thin Films Fabricated by Covalent Layer-by-Layer Assembly and Subsequent Lift-Off of Azlactone-Containing Polymer Multilayers

Maren E. Buck<sup>1</sup> and David M. Lynn<sup>1,2,\*</sup>

<sup>1</sup>Department of Chemistry, 1101 University Avenue, and <sup>2</sup>Department of Chemical and Biological Engineering, 1415 Engineering Drive, University of Wisconsin-Madison, Madison, WI 53706

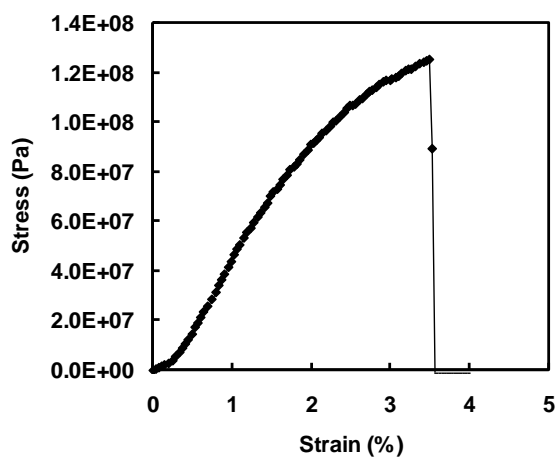

**Figure S1.** Stress-strain curve for a typical 100-bilayer freestanding PEI/PVDMA film. See text for additional details related to the fabrication and handling of these freestanding films.
